# Supplementary material
Source: PubMed Central journal article supplement (PMC2929022)
Supplement: NIHMS228492-supplement-Suppl__Text.pdf [file NIHMS228492-supplement-Suppl__Text.pdf]

## Supplemental Information

### The c-di-GMP Binding Protein YcgR Controls Flagellar Motor Direction and Speed to Affect Chemotaxis by a “Backstop Brake” Mechanism

Koushik Paul, Vincent Nieto, William C. Carlquist, David F. Blair, and Rasika M. Harshey

#### SUPPLEMENTAL EXPERIMENTAL PROCEDURES

**Media, Growth conditions, Cloning and Mutagenesis.** Procedures for transformation and plasmid isolation were described previously (Tang and Blair, 1995). Bacteria were grown in L-broth (LB) containing 10 g tryptone, 5 g Yeast extract and 5 g NaCl per liter. Antibiotics used in this study are ampicillin (100 $\mu$ g/ml), chloramphenicol (20 $\mu$ g/ml), and kanamycin (50 $\mu$ g/ml). P22 transduction was utilized to construct mutant combinations in *S. enterica*. Excision of KAN cassettes was achieved by expression of the FLP recombinase encoded on pCP20 (Datsenko and Wanner 2000).

For basic cloning and gene expression from a plasmid, gene sequences were amplified using PCR from the genomic DNA of wild-type *S. enterica* and cloned into pBAD24 (*ycgR*) or pBAD33 (*fliM*, *fliG*). Both cloning vectors are inducible with L-arabinose and have been previously described (Guzman et al., 1995). Specific mutations in *ycgR*, *fliM*, and *fliG*, and *gfp* fusion to the C-terminus of *ycgR* were constructed using over-lap extension PCR as previously described (Saiki et al., 1988), or using the Quick Change protocol (Stratagene, La Jolla, CA). Mutations were confirmed by DNA sequencing.

**Motility assays.** LB swarm plates were made using 0.6% Eiken agar (Eiken Chemical, Tokyo, Japan) and also were supplemented with 0.5% glucose (Wang et al., 2004). In the case of *ycgR* over-expression in *Salmonella*, 0.5% L-arabinose was substituted for glucose; this sugar supports swarming as efficiently as glucose (Harshey and Matsuyama, 1994). Swim plates were made using 0.3% bacto agar. *E.coli ycgR* were over-expressed using either IPTG (isopropyl- $\beta$ -D-thiogalactopyranoside) or sodium salicylate as noted in the corresponding figure legends. *Salmonella ycgR* were over-expressed using 0.2% L-arabinose. Antibiotics used in the motility plates are either ampicillin (50 $\mu$ g/ml) or chloramphenicol (50 $\mu$ g/ml) or both.

To measure the effect of over-expressed MotA, MotB, MotAB, or CheY on the motility of the  $\Delta yhjH$  or other motility-impaired strains, cells were transformed with the corresponding plasmids (listed in Supplementary Table 1), and induced with indole acrylic acid or arabinose. Controls were transformed with the parent vectors (pKG116, pTM30 or pRR48). Swimming was measured in plates containing appropriate antibiotics, and inducer(s) at the concentrations indicated in the corresponding figures.

Supplementary Figure 1

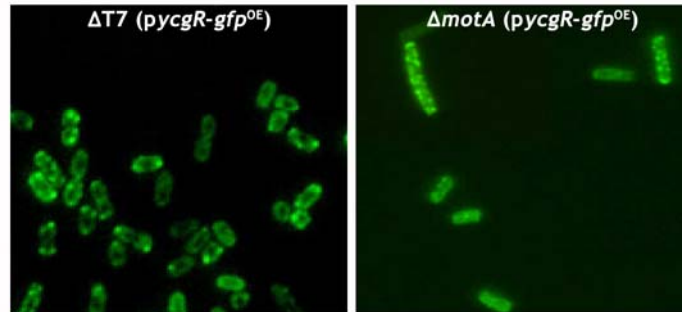

**Figure S1. YcgR localization in a *Salmonella* strain deleted for all chemoreceptors, and an *E. coli* strain deleted for MotA.** YcgR-GFP expression was induced with arabinose in *Salmonella* strain SM162 ( $\Delta T7$ ) and *E. coli* strain RP6666 ( $\Delta motA$ ), and examined by fluorescence microscopy.

## Supplementary Figure 2

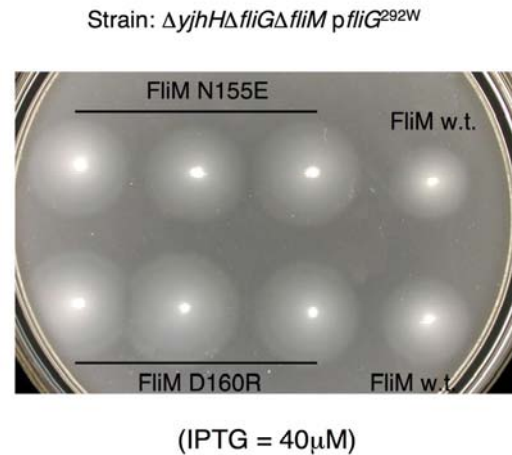

**Figure S2. Swimming phenotype of *E. coli* FliM mutants.** Plasmids expressing wild-type FliM (pDB94.A) or its mutant variants (N155E and D160R) were transformed into the  $\Delta yjhH\Delta fliG\Delta fliM$  strain along with a second plasmid (pHT53.N292W) expressing FliG with the N292W mutation. Fresh transformants were picked onto swim plates containing tryptone, 40 $\mu$ M IPTG, and 0.27% agar, and plates were incubated at 32°C for 9-10 h.

### Supplementary Figure 3

A

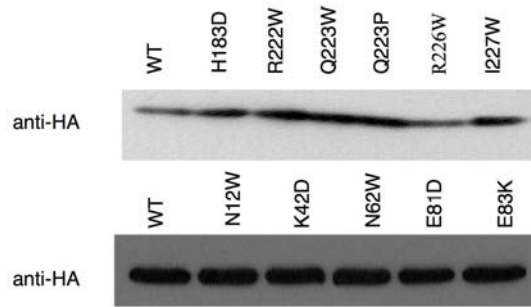

B

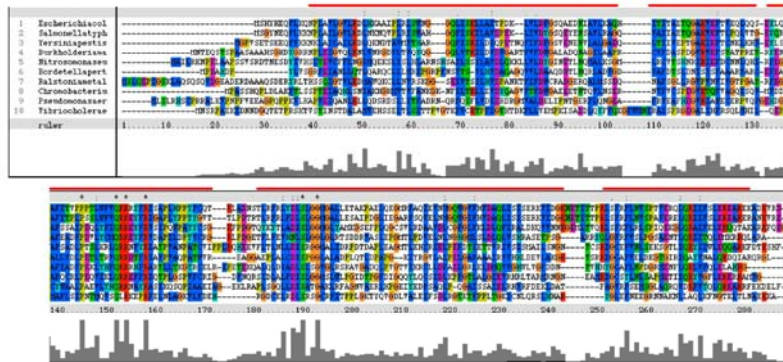

**Figure S3. Expression profile of *E. coli* YcgR mutants and multiple alignment of YcgR protein.** (A) Anti-HA immunoblots demonstrating the stability of HA-tagged YcgR proteins with the mutations indicated. (B) Alignment of YcgR sequences from several species. Segments included in the homology model of the *E. coli* protein are indicated by the red lines above the alignment.

Supplementary Figure 4

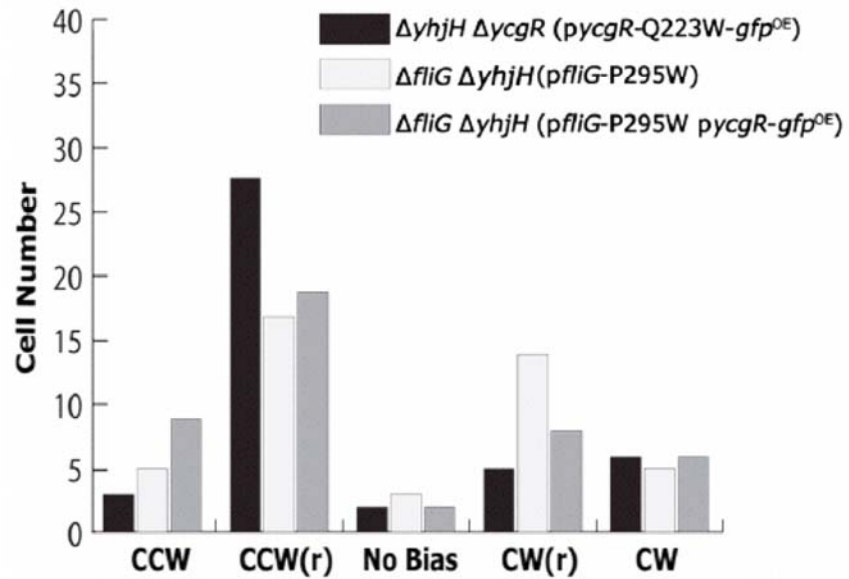

**Figure S4. Flagellar rotational bias and effects of the YcgR mutation Q223W and the FliG mutation P295W in *Salmonella*.**

Supplementary Figure 5

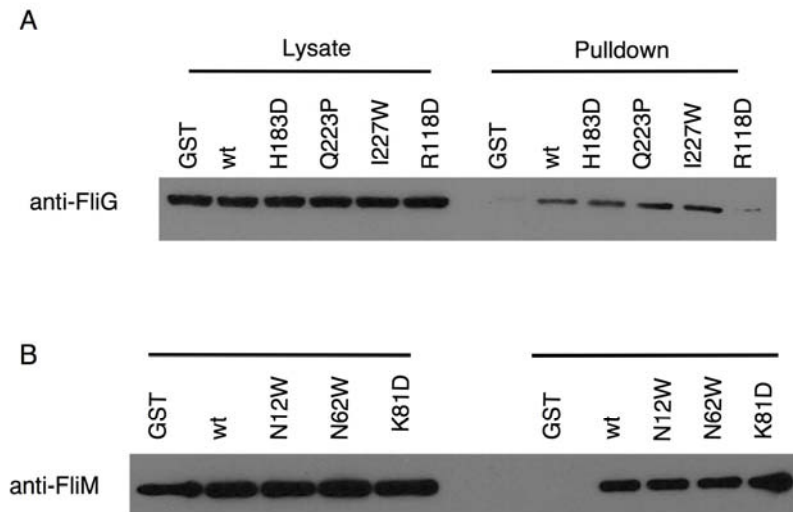

**Figure S5. Interaction of *E. coli* YcgR mutants with FliG (panel A) and FliM (panel B).** Pulldown experiments were carried out as described in Experimental Procedures, using a GST-YcgR fusion, and co-isolated FliG and FliM were detected on immunoblots. Samples included c-di-GMP at a concentration of 5  $\mu$ M. Lysate controls show the levels of protein in samples prior to treatment with the beads.

**Table S1. Strains and Plasmids**

| Strain or Plasmid          | Relevant genotype or properties                                | Source                         |
|----------------------------|----------------------------------------------------------------|--------------------------------|
| <i>E. coli</i>             |                                                                |                                |
| RP3098                     | $\Delta fliDC$ ; flagellar genes not expressed                 | J.S. Parkinson                 |
| RP6666                     | $\Delta motA1214$                                              | J.S. Parkinson                 |
| DB228                      | $\Delta fliM$ null strain                                      | Tang <i>et al.</i> (1995)      |
| MS296                      | wild-type <i>E. coli</i> strain                                | Ko <i>et al.</i> (2000)        |
| DB247                      | $\Delta fliG\Delta fliM$                                       | This study                     |
| MS1279                     | $\Delta ycgR$ ( $ycgR::$ FRT-FRT) in MS296                     | This study                     |
| MS1280                     | $\Delta yhjH$ ( $yhjH::$ FRT-FRT) in MS296                     | This study                     |
| MS1467                     | $\Delta ycgR\Delta yhjH$ ( $ycgR::$ TetRA) in MS1280           | This study                     |
| MS2234                     | $\Delta fliM\Delta yhjH$ ( $yhjH::$ TetRA) in DB228            | This study                     |
| MS2303                     | $\Delta fliG\Delta fliM\Delta yhjH$ ( $yhjH::$ TetRA) in DB247 | This study                     |
| <i>Salmonella enterica</i> |                                                                |                                |
| 14028                      | Wild-type ATCC Strain                                          | Mariconda <i>et al.</i> (2006) |
| QW108                      | $yhjH::$ KAN                                                   | Q. Wang                        |
| QW140                      | $\Delta fliG$                                                  | Q. Wang                        |
| QW165                      | $ycgR::$ KAN                                                   | Q. Wang                        |
| QW182                      | $\Delta fliM$                                                  | Q. Wang                        |
| QW262                      | $\Delta yhjH$                                                  | Wang <i>et al.</i> (2006)      |
| QW278                      | $\Delta ycgR$                                                  | Wang <i>et al.</i> (2006)      |
| SM162                      | deleted of all 7 chemotaxis receptors ( $\Delta 7T$ )          | S. Mariconda                   |
| SM380                      | $\Delta cheZ$                                                  | S. Mariconda                   |
| SM387                      | $\Delta cheB$                                                  | S. Mariconda                   |
| VN10                       | 14028 ( $pycgR$ )                                              | This Study                     |
| VN11                       | $\Delta yhjH$ ( $pycgR$ )                                      | This Study                     |
| VN29                       | $\Delta cheB yhjH::$ KAN ( $pycgR$ )                           | This Study                     |
| VN33                       | $\Delta cheZ \Delta yhjH$ ( $pycgR$ )                          | This Study                     |
| VN45                       | 14028 ( $pycgR-gfp$ )                                          | This Study                     |
| VN46                       | $\Delta yhjH$ ( $pycgR-gfp$ )                                  | This Study                     |
| VN47                       | $\Delta 7T$ ( $pycgR-gfp$ )                                    | This Study                     |
| VN50                       | $\Delta fliM yhjH::$ KAN ( $pycgR-gfp$ )                       | This Study                     |
| VN55                       | $\Delta yhjH \Delta ycgR$                                      | This Study                     |
| VN67                       | $\Delta yhjH \Delta ycgR$ ( $pycgR-gfp$ )                      | This Study                     |
| VN70                       | $\Delta yhjH \Delta ycgR$ ( $pycgR-R118D-gfp$ )                | This Study                     |
| VN71                       | $\Delta fliM$ ( $pfliM$ )                                      | This Study                     |
| VN73                       | $\Delta fliM yhjH::$ KAN ( $pfliM$ )                           | This Study                     |
| VN78                       | $\Delta fliM yhjH::$ KAN ( $pfliM-N155E$ )                     | This Study                     |
| VN79                       | $\Delta fliM yhjH::$ KAN ( $pfliM-L160E$ )                     | This Study                     |
| VN80                       | $\Delta fliM yhjH::$ KAN ( $pfliM-N155E$ ; $pycgR-gfp$ )       | This Study                     |
| VN81                       | $\Delta fliM yhjH::$ KAN ( $pfliM-L160E$ ; $pycgR-gfp$ )       | This Study                     |



|      |                                                                    |            |
|------|--------------------------------------------------------------------|------------|
| VN82 | $\Delta yhjH \Delta ycgR$ ( <i>pycgR</i> -Q223W)                   | This Study |
| VN83 | $\Delta fliG$ ( <i>pfliG</i> )                                     | This Study |
| VN84 | $\Delta fliG$ ( <i>pfliG</i> -P295W)                               | This Study |
| VN85 | $\Delta fliG yhjH::$ KAN ( <i>pfliG</i> -P295W)                    | This Study |
| VN86 | $\Delta fliG yhjH::$ KAN ( <i>pfliG</i> -P295W; <i>pycgR-gfp</i> ) | This Study |
| VN88 | <i>fliN::</i> KAN ( <i>pycgR-gfp</i> )                             | This Study |
| VN89 | $\Delta yhjH fliN::$ KAN ( <i>pycgR-gfp</i> )                      | This Study |
| VN90 | $\Delta motA yhjH::$ KAN ( <i>pycgR-gfp</i> )                      | This Study |

## Plasmid or

### Phage

|         |                                                         |                             |
|---------|---------------------------------------------------------|-----------------------------|
| pCP20   | FLP Recombinase                                         | Datsenko & Wanner (2006)    |
| pKD4    | Kanamycin Template                                      | Datsenko & Wanner (2006)    |
| pKD46   | $\lambda$ Red Recombinase                               | Datsenko & Wanner (2006)    |
| pBAD24  | Cloning Vector; Ap <sup>R</sup>                         | Guzman <i>et al.</i> (1995) |
| pBAD33  | Cloning Vector; Cm <sup>R</sup>                         | Guzman <i>et al.</i> (1995) |
| pRR48   | <i>Ptac</i> expression vector, Ap <sup>R</sup>          | J.S. Parkinson              |
| pKG116  | salicylate-inducible expression vector, Cm <sup>R</sup> | J.S. Parkinson              |
| pTM30   | <i>Ptac</i> expression vector, Ap <sup>R</sup>          | Paul <i>et al.</i> (2006)   |
| pHT39   | <i>FliN</i> expression vector                           | Lloyd <i>et al.</i> (1996)  |
| pHT100  | GST-only (negative control) vector                      | Tang <i>et al.</i> (1996)   |
| pHT53   | <i>FliG</i> expression vector                           | Tang <i>et al.</i> (1996)   |
| pLW3.33 | <i>Ptrp-motB</i> , Ap <sup>R</sup>                      | Zhou <i>et al.</i> (1998)   |
| pDB45   | <i>Ptrp-motAmotB</i> , Ap <sup>R</sup> ,                | Zhou <i>et al.</i> (1998)   |
| pDB66   | <i>Para-cheY</i> , Cm <sup>R</sup>                      | Paul <i>et al.</i> (2006)   |
| pDB94.A | <i>Ptac-fliM</i> , Cm <sup>R</sup>                      | This study                  |
| pGM1    | <i>Ptac-motB</i> , Ap <sup>R</sup>                      | Zhou <i>et al.</i> (1998)   |
| pSB1    | PT7- <i>motA</i> <sub>70-170</sub> , Ap <sup>R</sup>    | This study                  |
| pKP41   | <i>fliN</i> in pKG116                                   | This study                  |
| pKP99   | <i>ycgR</i> in pKG116                                   | This study                  |
| pKP198  | <i>fliL</i> in pKG116                                   | This study                  |
| pKP203  | <i>ycgR</i> in pRR48                                    | This study                  |
| pKP232  | <i>ycgR</i> <sup>R118D</sup> in pKG116                  | This study                  |
| pKP233  | <i>ycgR</i> -HA tag in pRR48                            | This study                  |
| pKP234  | <i>ycgR</i> <sup>R118D</sup> -HA tag in pRR48           | This study                  |
| pKP266  | <i>ycgR</i> -HA tag in pHT100                           | This study                  |
| pKP283  | <i>ycgR</i> <sup>R118D</sup> -HA tag in pHT100          | This study                  |
| pKP298  | <i>fliG</i> <sup>297C</sup> -HA tag in pKG116           | This study                  |
| pKP299  | <i>fliG</i> <sup>117+166C</sup> - HA tag in pKG116      | This study                  |
| pKP347  | <i>ycgR</i> -HA tag in pKG116                           | This study                  |
| VNP5    | <i>pycgR</i> cloned in pBAD24                           | This study                  |
| VNP8    | <i>pycgR-gfp</i> in pBAD24                              | This Study                  |
| VNP11   | <i>pycgR</i> -R118D- <i>gfp</i> in pBAD24               | This Study                  |
| VNP14   | <i>pfliM</i> in pBAD33                                  | This Study                  |
| VNP18   | <i>pfliM</i> -N155E in pBAD33                           | This Study                  |

|       |                               |            |
|-------|-------------------------------|------------|
| VNP19 | <i>pfliM</i> -L160E in pBAD33 | This Study |
| VNP20 | <i>pycgR-gfp</i> in pBAD33    | This Study |
| VNP22 | <i>pycgR</i> -Q223W in pBAD24 | This Study |
| VNP24 | <i>pfliG</i> in pBAD33        | This Study |
| VNP27 | <i>pfliG</i> -P295W in pBAD33 | This Study |

---

|           |              |                                |
|-----------|--------------|--------------------------------|
| Phage P22 | HT12/4int103 | Mariconda <i>et al.</i> (2006) |
|-----------|--------------|--------------------------------|

---

## Supplemental References

Datsenko, K.A., and Wanner, B.L. (2000). One-step inactivation of chromosomal genes in *Escherichia coli* K-12 using PCR products. *Proc Natl Acad Sci U S A* 97, 6640-6645.

Guzman, L.M., Belin, D., Carson, M.J., and Beckwith, J. (1995). Tight regulation, modulation, and high-level expression by vectors containing the arabinose PBAD promoter. *J Bacteriol* 177, 4121-4130.

Harshey, R.M. and T. Matsuyama. 1994. Dimorphic transition in *Escherichia coli* and *Salmonella typhimurium*: surface-induced differentiation into hyperflagellate swarmer cells. *Proc Natl Acad Sci U S A* 91: 8631-8635.

Ko, M., and Park, C. (2000). Two novel flagellar components and H-NS are involved in the motor function of *Escherichia coli*. *J. Mol. Biol.* 303, 371-382.

Lloyd, S.A., Tang, H., Wang, X., Billings, S., and Blair, D.F. (1996). Torque generation in the flagellar motor of *Escherichia coli*: Evidence of a direct role for FliG but not for FliM or FliN. *J. Bacteriol.* 178, 223-231.

Mariconda, S., Wang, Q., and Harshey, R.M. (2006). A mechanical role for the chemotaxis system in swarming motility. *Mol Microbiol* 60, 1590-1602.

Paul, K., Harmon, J.G., and Blair, D.F. (2006). Mutational analysis of the flagellar rotor protein FliN: Identification of surfaces important for flagellar assembly and switching. *J. Bacteriol.* 188, 5340-5248.

Saiki, R.K., D.H. Gelfand, S. Stoffel, S.J. Scharf, R. Higuchi, G.T. Horn, K.B. Mullis, and H.A. Erlich. 1988. Primer-directed enzymatic amplification of DNA with a thermostable DNA polymerase. *Science* 239: 487-491.

- Tang, H., and Blair, D.F. (1995). Regulated underexpression of the FliM protein of *Escherichia coli* and evidence for a location in the flagellar motor distinct from the MotA/MotB torque generators. *J. Bacteriol.* *177*, 3485-3495.
- Tang, H., Braun, T.F., and Blair, D.F. (1996). Motility protein complexes in the bacterial flagellar motor. *J. Mol. Biol.* *261*, 209-221.
- Wang, Q., J.G. Frye, M. McClelland, and R.M. Harshey. 2004. Gene expression patterns during swarming in *Salmonella typhimurium*: genes specific to surface growth and putative new motility and pathogenicity genes. *Mol Microbiol* **52**: 169-187.
- Wang, Q., Mariconda, S., Suzuki, A., McClelland, M., and Harshey, R.M. (2006). Uncovering a large set of genes that affect surface motility in *Salmonella enterica* serovar Typhimurium. *J Bacteriol* *188*, 7981-7984.
- Zhou, J., Lloyd, S.A., and Blair, D.F. (1998). Electrostatic interactions between rotor and stator in the bacterial flagellar motor. *Proc. Natl. Acad. Sci. USA* *95*, 6436-6441.
